# Supplementary material
Source: PubMed Central journal article supplement (PMC6534233)
Supplement: IORT_A_1577049_SM4030.pdf [file IORT_A_1577049_SM4030.pdf]

## Supplementary data

Table 1. Discharge criteria for discharge on DOS

|                                                                                                                                                                                                                                                                                                                                                                                                                                                                                                                                                                                                                                                                                 |
|---------------------------------------------------------------------------------------------------------------------------------------------------------------------------------------------------------------------------------------------------------------------------------------------------------------------------------------------------------------------------------------------------------------------------------------------------------------------------------------------------------------------------------------------------------------------------------------------------------------------------------------------------------------------------------|
| DOS discharge criteria                                                                                                                                                                                                                                                                                                                                                                                                                                                                                                                                                                                                                                                          |
| <ul style="list-style-type: none"> <li>• &lt; 500 ml intraoperative blood loss</li> <li>• Back in ward before 15.00 hours</li> <li>• Received instruction from physiotherapist and is safely mobilized</li> <li>• No clinical symptoms of anemia</li> <li>• Pain &lt; 3 while resting, &lt; 5 during mobilization</li> <li>• Spontaneous micturition</li> <li>• Postoperative radiographs performed and approved</li> <li>• Relatives or friends with patient for initial 24 postoperative hours</li> <li>• Motivated and accepts same-day discharge</li> <li>• Can be discharged before 20.00 hours</li> <li>• Fulfillment of functional discharge criteria (below)</li> </ul> |
| Functional discharge criteria                                                                                                                                                                                                                                                                                                                                                                                                                                                                                                                                                                                                                                                   |
| <ul style="list-style-type: none"> <li>• Able to get dressed independently</li> <li>• Able to get in and out of bed</li> <li>• Able to sit and rise from a chair/toilet</li> <li>• Independent in personal care</li> <li>• Mobilized with walker/crutches</li> <li>• Able to walk &gt; 70 m with walker/crutches</li> </ul>                                                                                                                                                                                                                                                                                                                                                     |

Table 3. Reason for LOS (length of stay) > 4 days for matched patients in the control cohort

| Patient no. | Reason for LOS > 4 days                                |
|-------------|--------------------------------------------------------|
| 1           | No specific reason identified                          |
| 2           | Chest pain on postop day 1 All tests normal            |
| 3           | Subtrochanteric fracture on postop day 2               |
| 4           | Paralytic ileus on postop day 3 conservatively treated |

Table 4. Readmission within 90 days following surgery for outpatient patients (n = 116)

| Complication type       | Specific complication (n = 7)                      | Postoperative day no. for readmission      |
|-------------------------|----------------------------------------------------|--------------------------------------------|
| Infection (n = 1)       | Periprosthetic infection                           | Treated with debridement and irrigation 48 |
| Thromboembolism (n = 2) | Clinical suspicion of DVT                          | Ruled out by ultrasound 6, 9               |
| Fracture (n = 2)        | Periprosthetic fracture due to fall                | Revised with revision THA 6                |
|                         | Periprosthetic fracture without trauma             | ORIF with cables 25                        |
| Urologic (n = 2)        | Post renal kidney failure due to urinary retention | Treated with urinary catheter and fluids 2 |
|                         | Urinary retention                                  | Treated with urinary catheter 7            |

Table 5. Readmission within 90 days following surgery for matched patients (n = 339)

| Complication type        | Specific complication (n = 13)                             | Postoperative day no. for readmission          |
|--------------------------|------------------------------------------------------------|------------------------------------------------|
| Infection (n = 3)        | Periprosthetic infections (2)                              | Treated with debridement and irrigation 14, 58 |
|                          | Suspicion of superficial wound infection (1)               | Treated with antibiotics 17                    |
| Thromboembolism (n = 6)  | Clinical suspicion of DVT (5)                              | Ruled out by ultrasound 4, 7, 8, 14, 26        |
|                          | Clinical suspicion of DVT, confirmed by ultrasound (1)     | Treated with anticoagulants 5                  |
| Cardiac (n = 1)          | Dyspnea, all tests normal. Hemoglobin measured at 9.4 g/dl | Treated with oral iron 9                       |
| Gastrointestinal (n = 1) | Abdominal pain due to Ogilvie syndrome                     | 7                                              |
| Fracture (n = 1)         | Fall and contralateral femoral neck fracture               | 51                                             |
| Pulmonary (n = 1)        | Acute COPD exacerbation                                    | 47                                             |

COPD = Chronic obstructive pulmonary disease
